# Supplementary material for: Exploring the Antecedent: A Cross-Lagged Panel Network Analysis of the Association between Rumination and Mobile Phone Addiction
Source: Research Square preprint supplement (doi:10.21203/rs.3.rs-7070386/v1), 2025-10-06
Supplement: Supplementary file 1 [file 9dc57f3d05a58d3811a9cebe.docx]

Supplementary materials


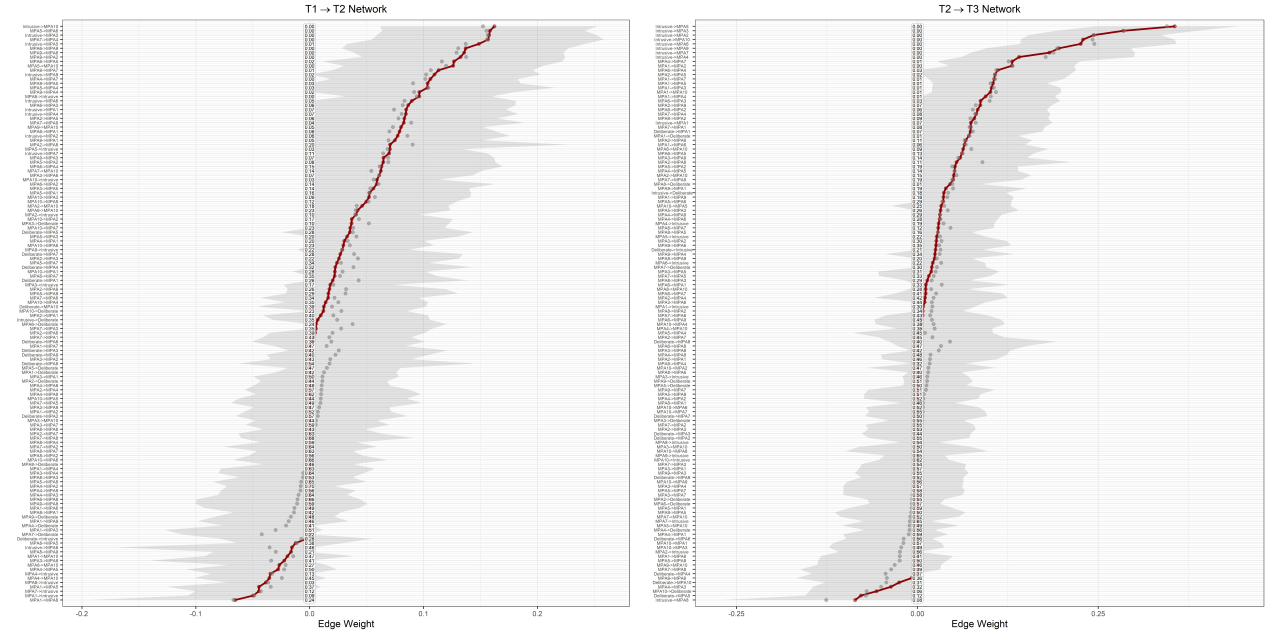


Figure S1. Stability tests for edges


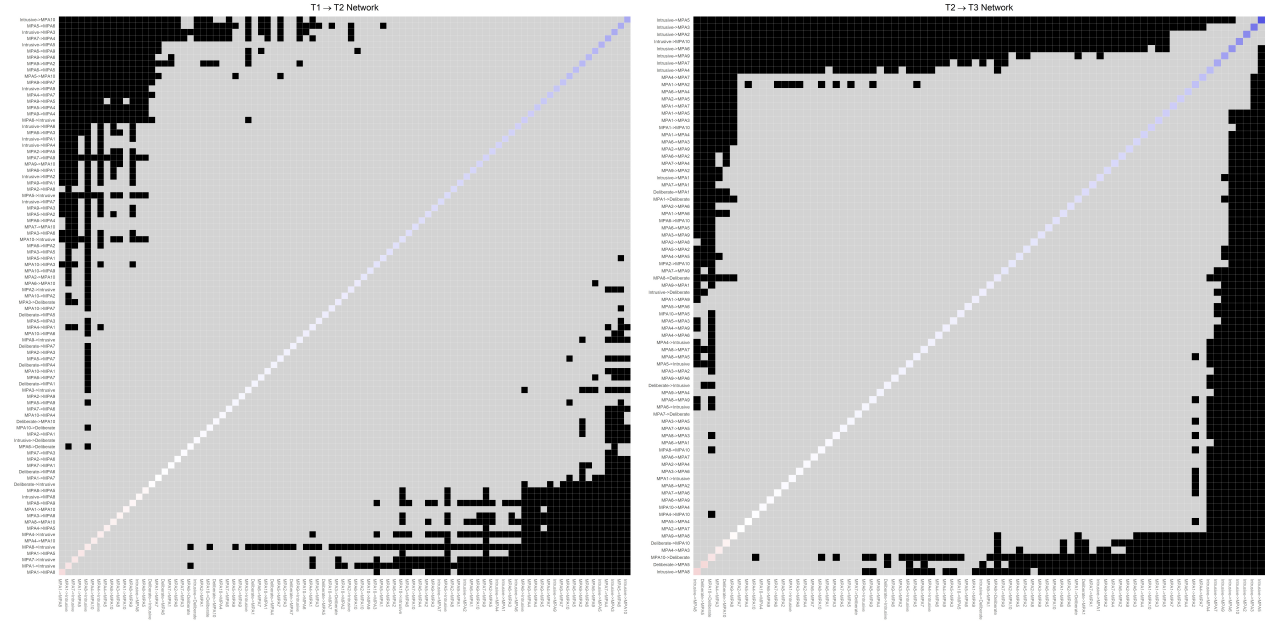


Figure S2. Difference tests for edge weights


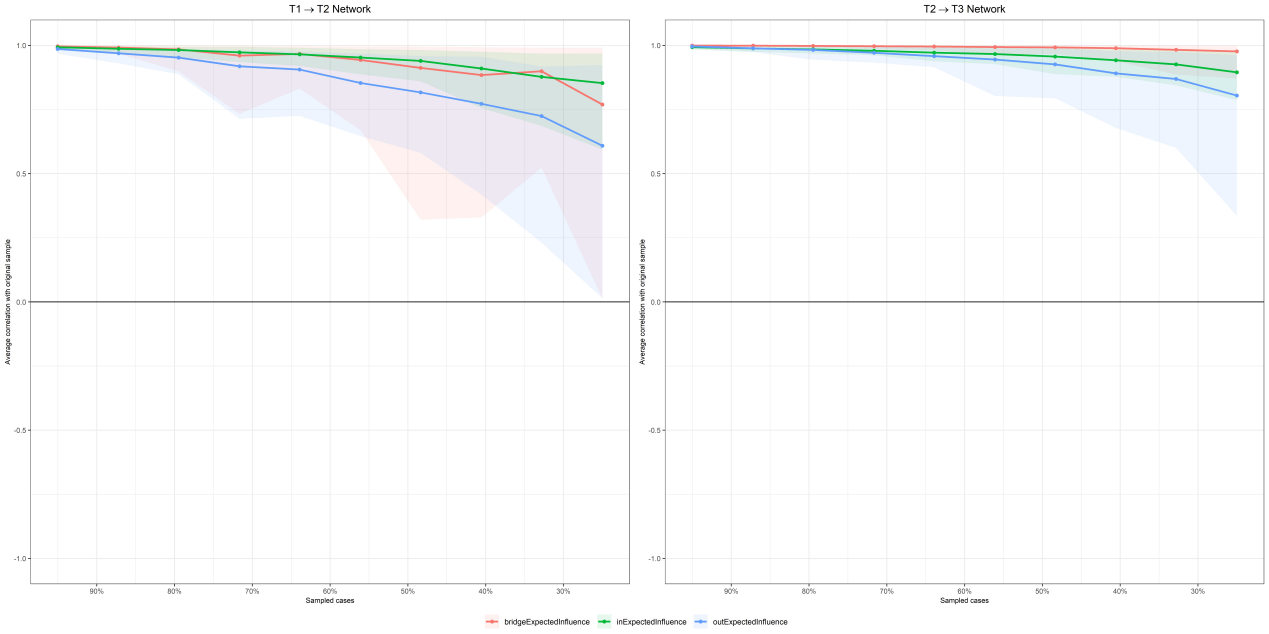


Figure S3. Stability tests for centrality


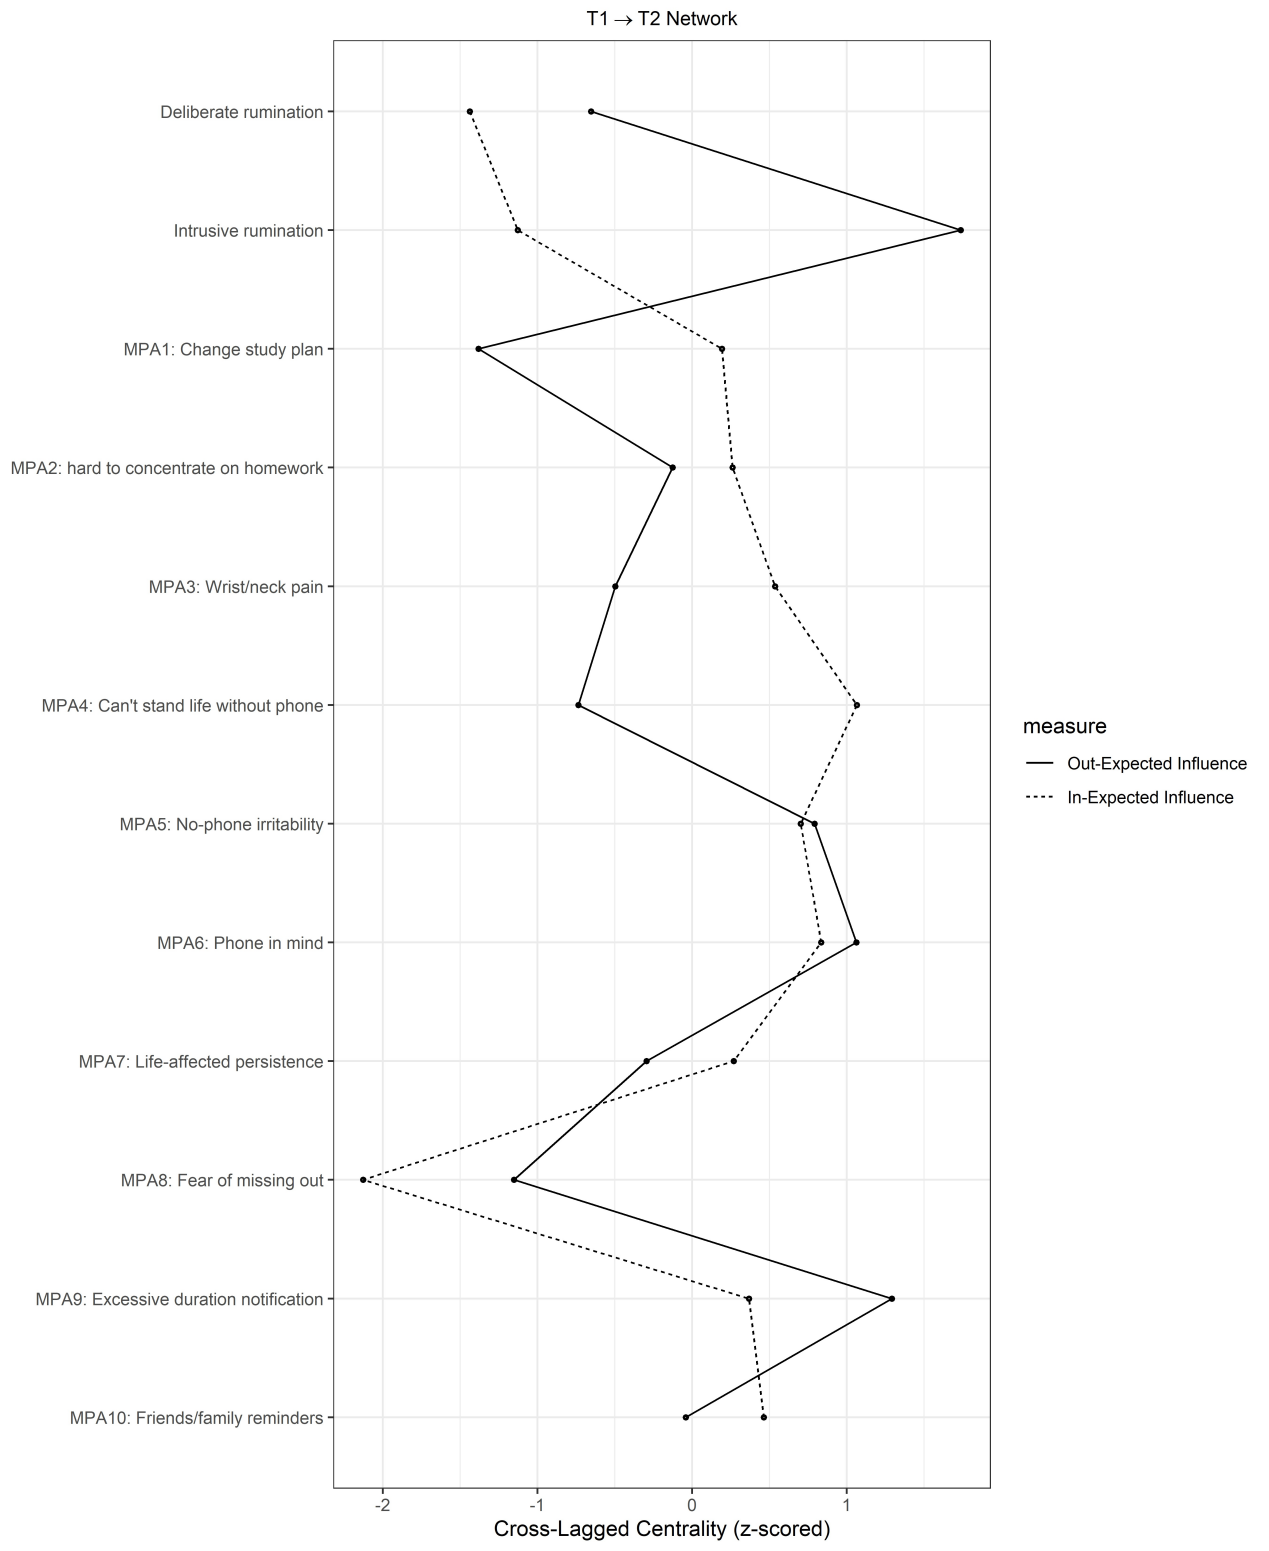


Figure S4. Cross-lagged centrality for T1-T2 network


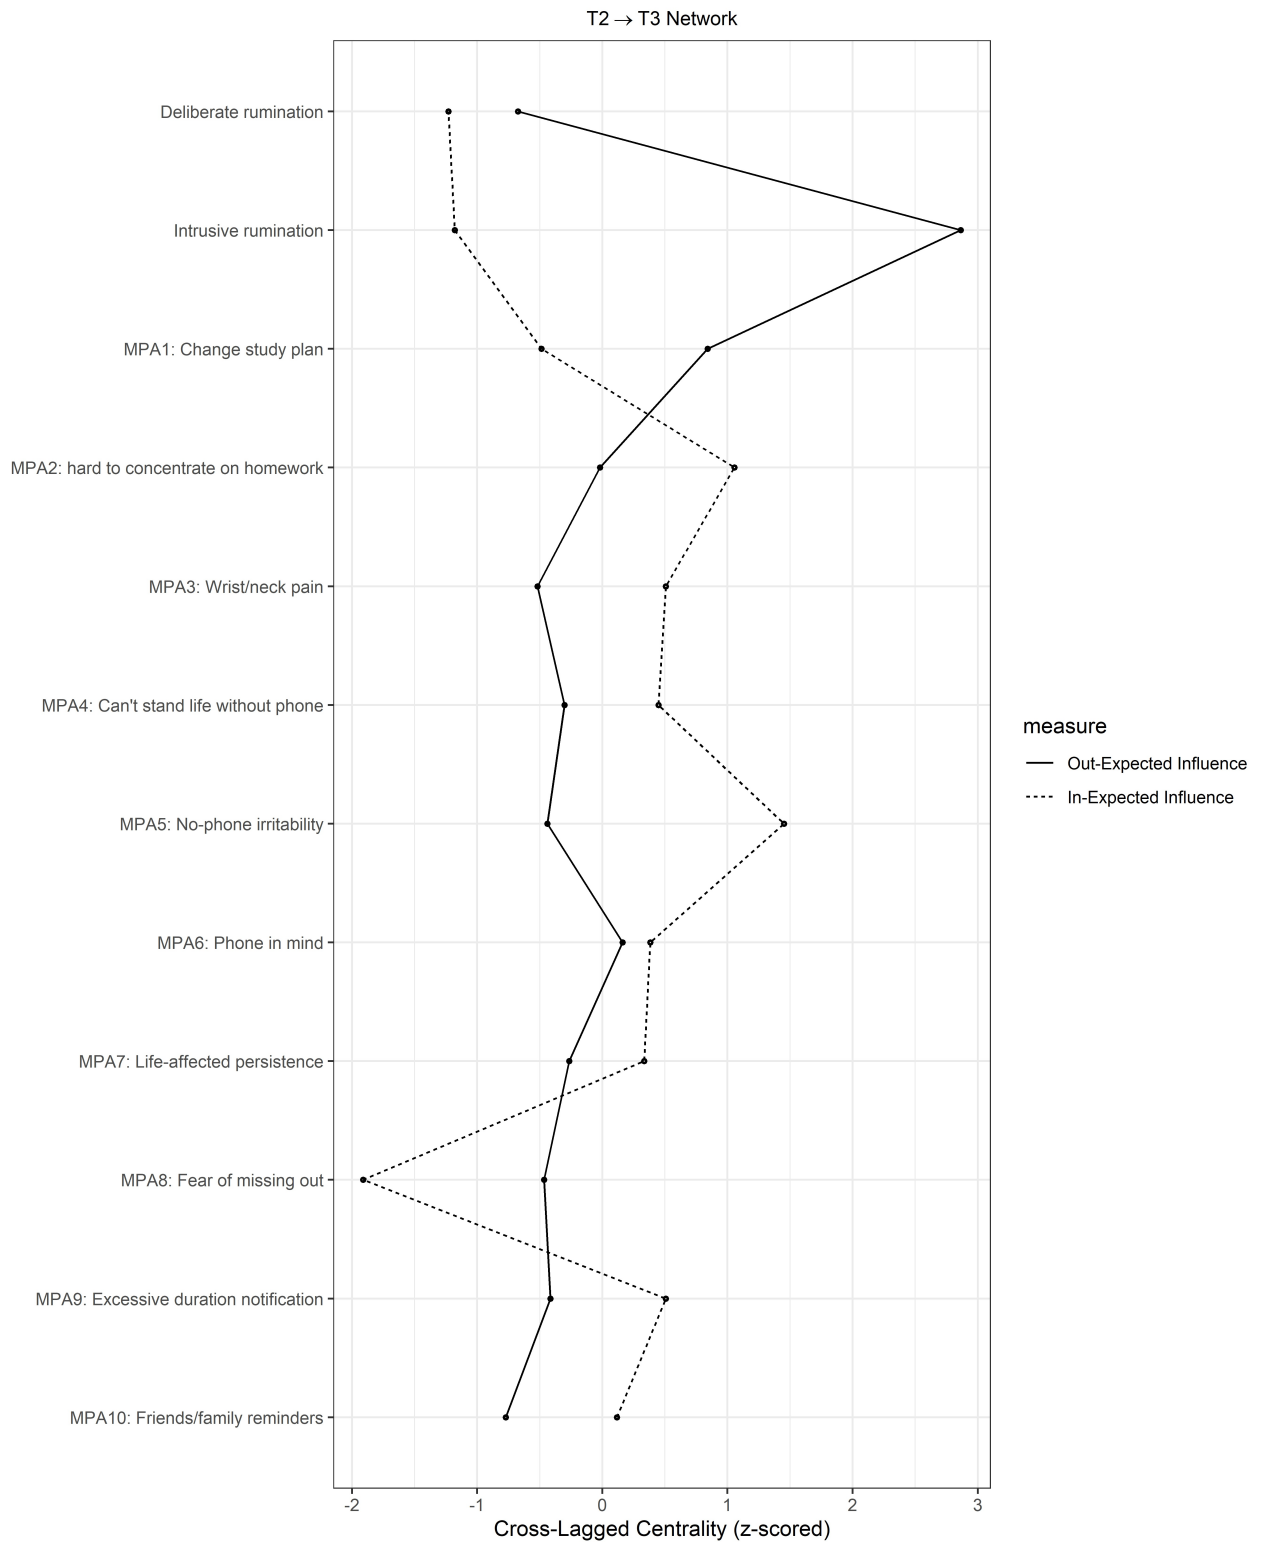


Figure S5. Cross-lagged centrality for T2-T3 network


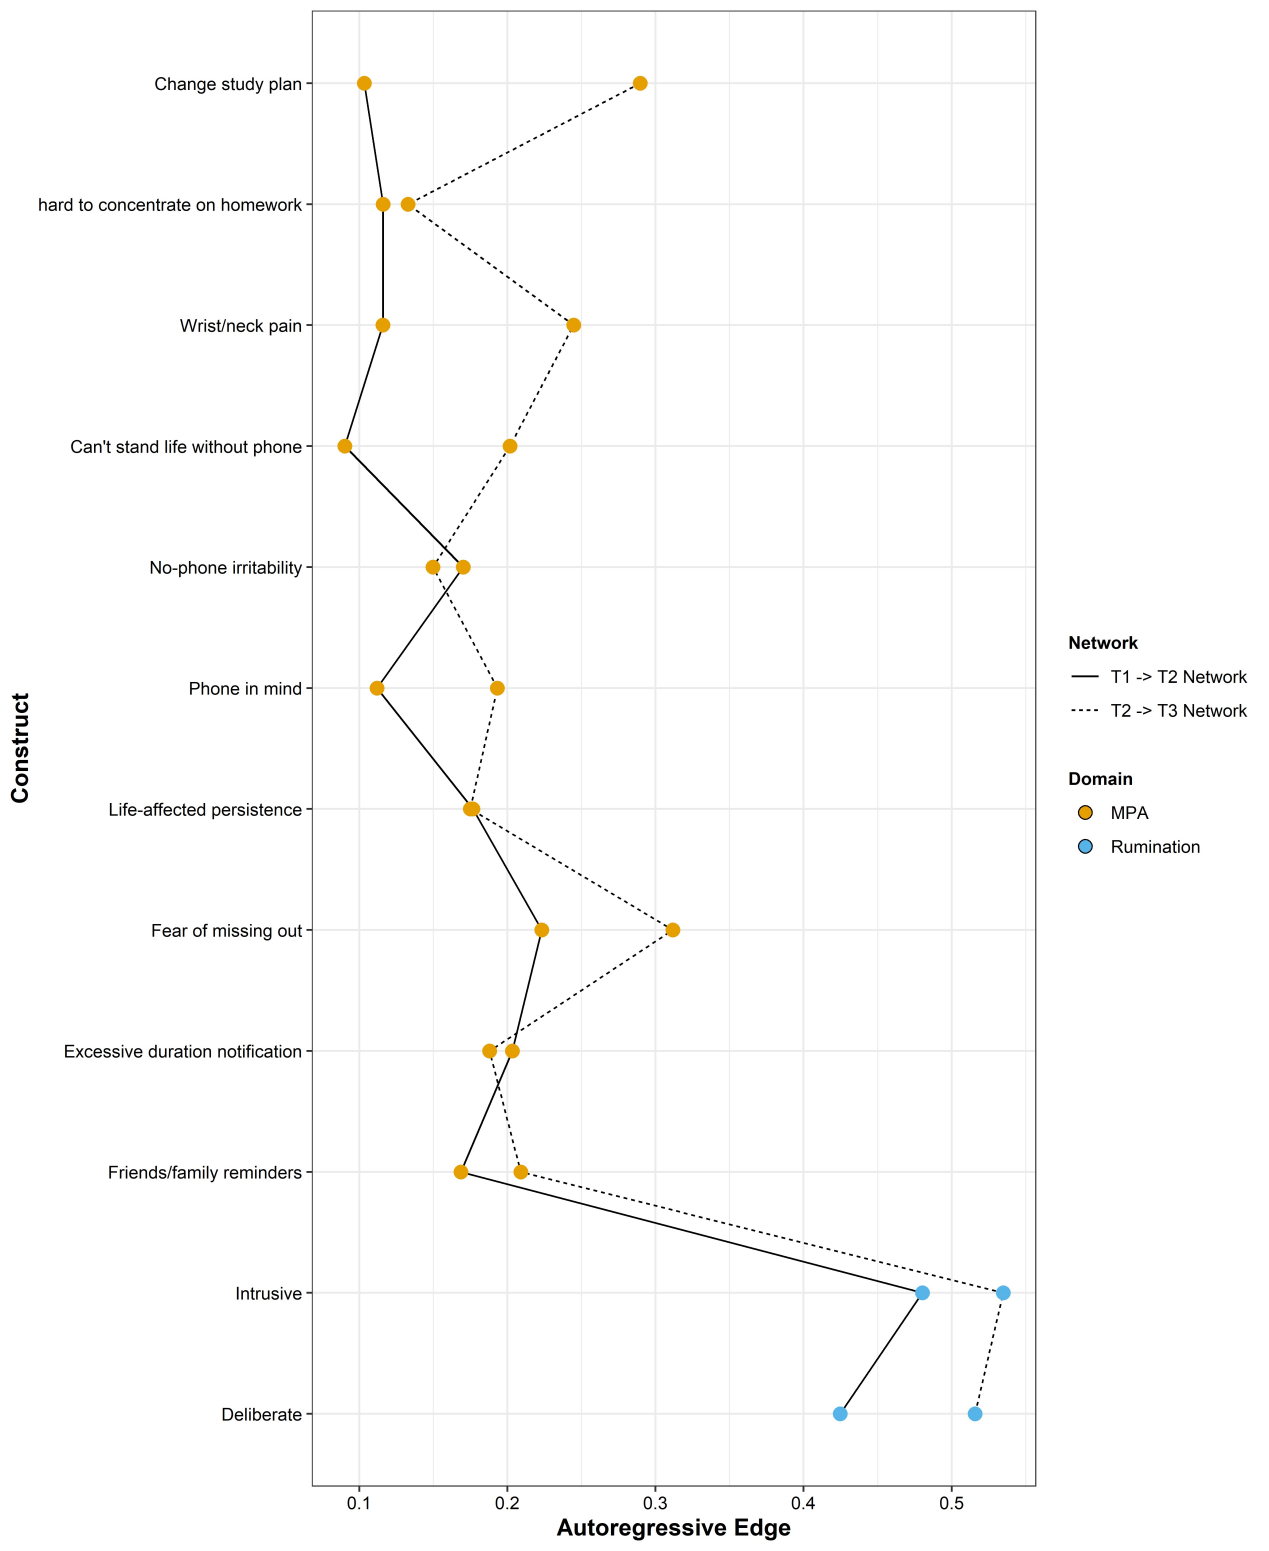


Figure S6. Autoregressive edges of two networks


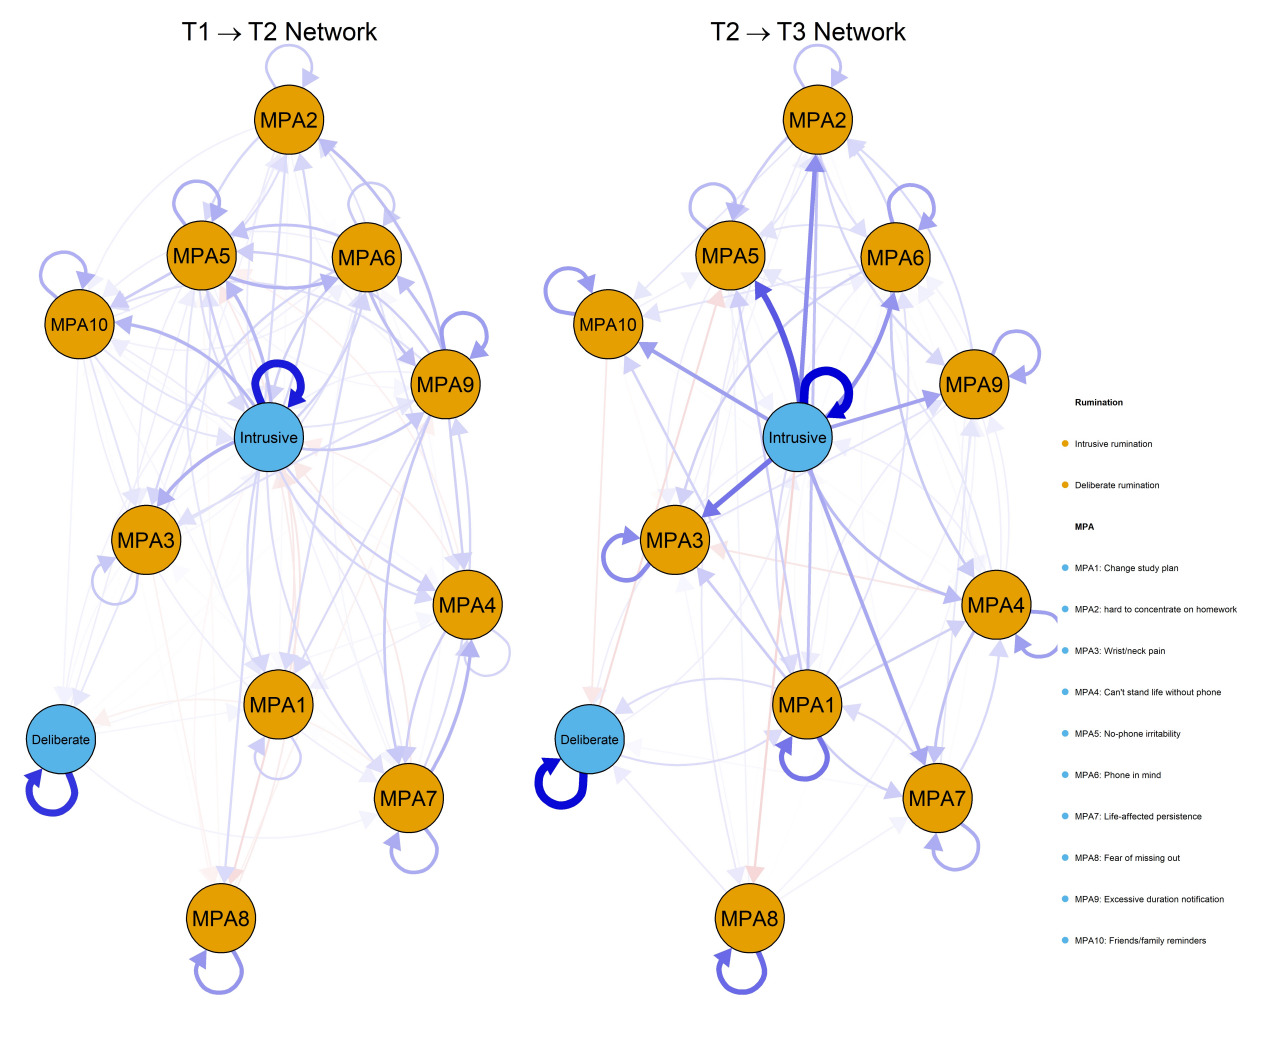


Figure S7. CLPN plots with both autoregressive and cross-lagged edges
